# Supplementary material for: Adverse stimulation of 4-nonylphenol in abnormal reproductive organs of female chickens
Source: PubMed Central journal article supplement (PMC5746362; doi:10.18632/oncotarget.21858), 2017-10-16
Supplement: oncotarget-08-110029-s001.pdf [file oncotarget-08-110029-s001.pdf]

## Adverse stimulation of 4-nonylphenol in abnormal reproductive organs of female chickens

### SUPPLEMENTARY MATERIALS

**Supplementary Table 1: Oligonucleotide primers used in RT-qPCR analysis for gonadal hormone genes expression in HPO axis of gallus**

| Gene                 | ReSeq ID     | Sequence of primer                                                              | PCR products |
|----------------------|--------------|---------------------------------------------------------------------------------|--------------|
| $\beta$ -actin       | L08165       | Forward:5'- CCGCTCTATGAAGGCTACGC -3'<br>Reverse:5'- CTCTCGGCTGTGGTGGTGAA -3'    | 128bp        |
| GnRH                 | AY635931     | Forward:5'- GTTCTCCTGTTTACCACGTCT -3'<br>Reverse:5'- TTCCACCAGATTTTCAGCGTTC -3' | 99bp         |
| PRLH                 | NM_001082419 | Forward:5'- AGGAACCCAGACATCGACCC -3'<br>Reverse:5'- CCGTCGCCCCGAATCTCCC -3'     | 72bp         |
| FSH                  | AB086952.1   | Forward:5'-TGGTGCTCAGGATACTGCTTCA-3'<br>Reverse:5'-AGATTCAGGATGGTCACCGCAG-3'    | 132bp        |
| LH                   | S70834       | Forward: 5'-AACCCGTTTACCGCAGCC-3'<br>Reverse: 5'- GCAGCCCCATAGATCCCAAC-3'       | 92bp         |
| PRL                  | AB162003     | Forward: 5'-GGTTCATTCTGGCGATGGTGGA-3'<br>Reverse: 5'-CGGAAGCAATGCAGCAGGTTGT-3'  | 120bp        |
| P450 <sub>scc</sub>  | NM_001001756 | Forward: 5'-AGCACTTCAAGGGACTGAGC-3'<br>Reverse: 5'- ACTTGGTCCCAACTTCCACC-3'     | 147bp        |
| P450 <sub>arom</sub> | S46949       | Forward: 5'- TGATGACATGCCAAACCTCA-3'<br>Reverse: 5'- CCAGCTTGTGCATACGTCCA-3'    | 173bp        |
| 3 $\beta$ -HSD       | FJ607242     | Forward: 5'- CACAGAAAGCCAGACGCATC-3'<br>Reverse: 5'- AAAGCCCAGCTCCTTGGTCA-3'    | 107bp        |
| 17 $\beta$ -HSD      | AB002410.1   | Forward: 5'- CAGCTCTACCGCCGCTACCTG-3'<br>Reverse: 5'- GCGATGGCCTCCAAGAACACC-3'  | 98bp         |
| ER $\alpha$          | AF442965.1   | Forward: 5'-TGTCCTGCCACTAACCA-3'<br>Reverse: 5'- TTTCATCATTCGCCAC-3'            | 138bp        |
| ER $\beta$           | AF045149     | Forward: 5'-AACCCGTTTACCGCAGCC-3'<br>Reverse: 5'- GCAGCCCCATAGATCCCAAC-3'       | 96bp         |
| stAR                 | NM_204686    | Forward: 5'- AAGCCCTGCAGAAATCACTC -3'<br>Reverse: 5'- TCAGCACTTTGTCTCCGTTG -3'  | 87bp         |
| PGR                  | AB265142     | Forward: 5'- GTCAGACTCCAAGTTAGCCA -3'<br>Reverse: 5'- GGAATTAGCCACAACACCCT -3'  | 177bp        |
